# Supplementary material for: Variants Within Genes EDIL3 and ADGRB3 are Associated With Divergent Fecal Egg Counts in Katahdin Sheep at Weaning
Source: PubMed Central journal article supplement (PMC8960952; doi:10.3389/fgene.2022.817319), 2022-03-10
Supplement: Presentation1.pdf [file Presentation1.pdf]

## *Supplementary Material*

- 1 Supplementary Data**
- 2 Supplementary Figures and Tables**
- 2.1 Supplementary Figures**

### **Supplemental Figures**

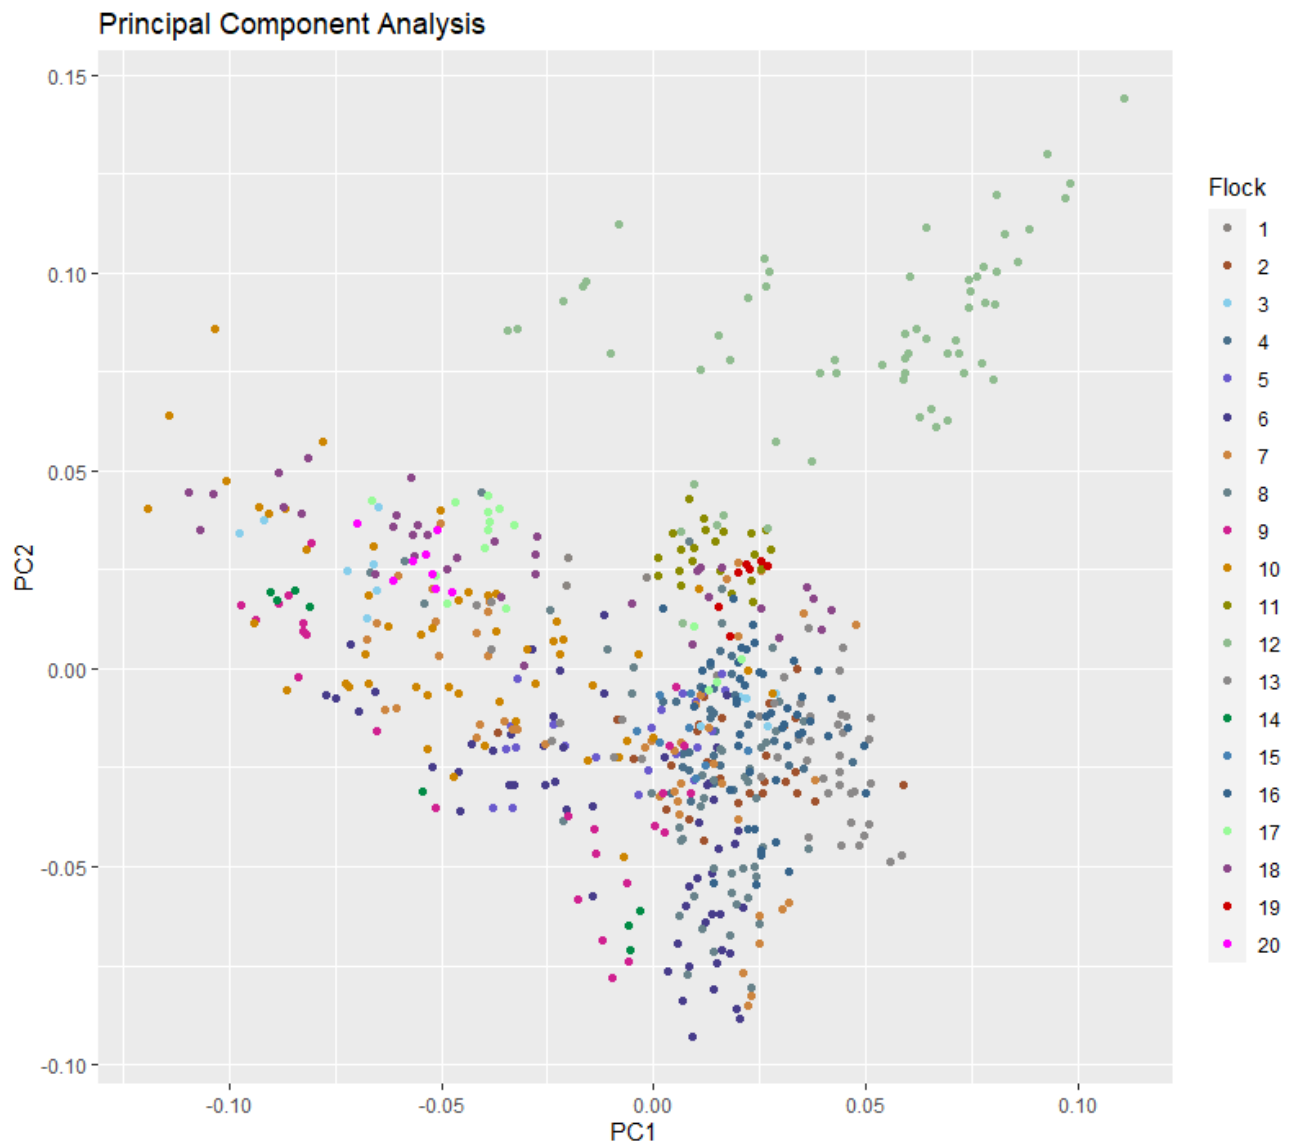

**Supplementary Figure S1.** Principal component analysis (PCA) of Katahdin study population. Animals are color-coded by flock.

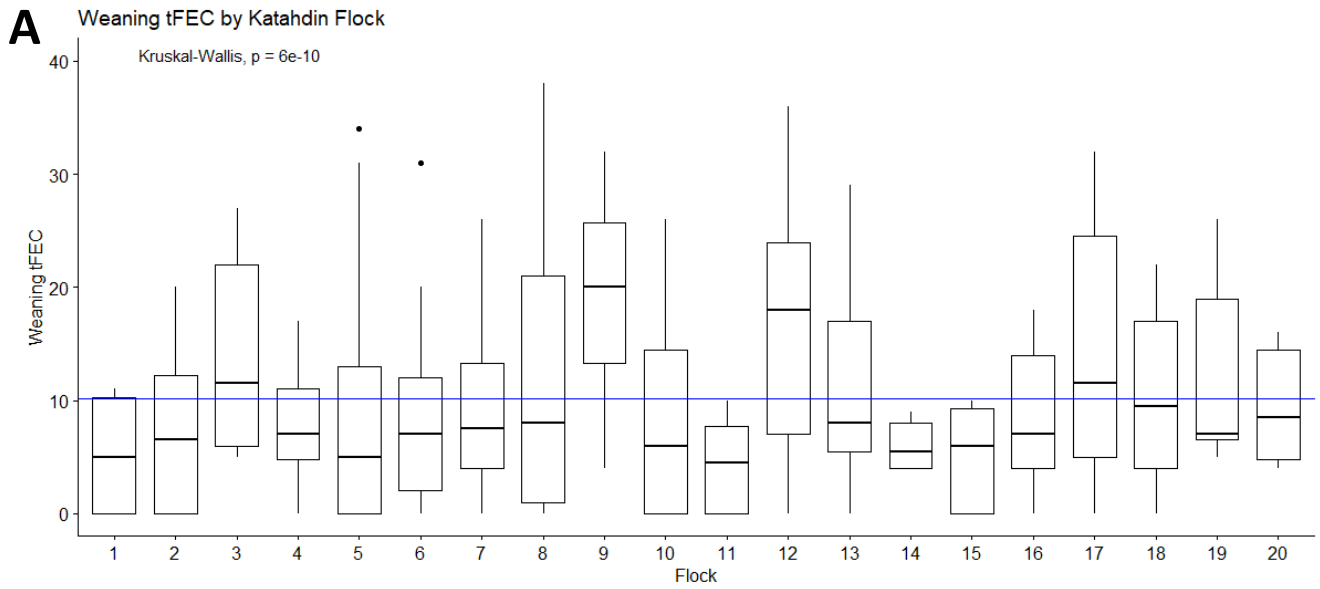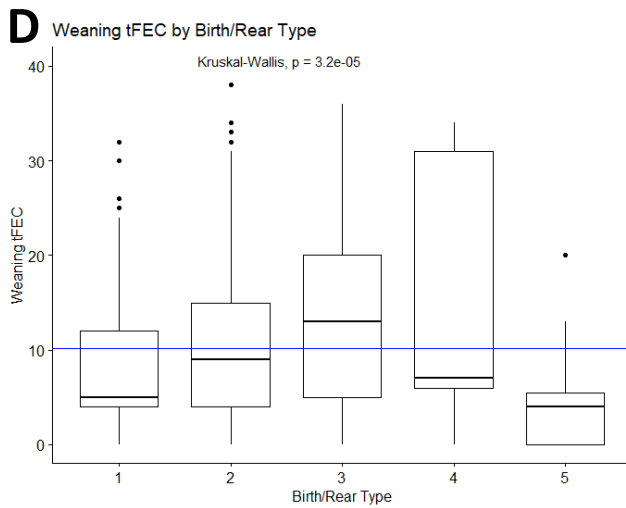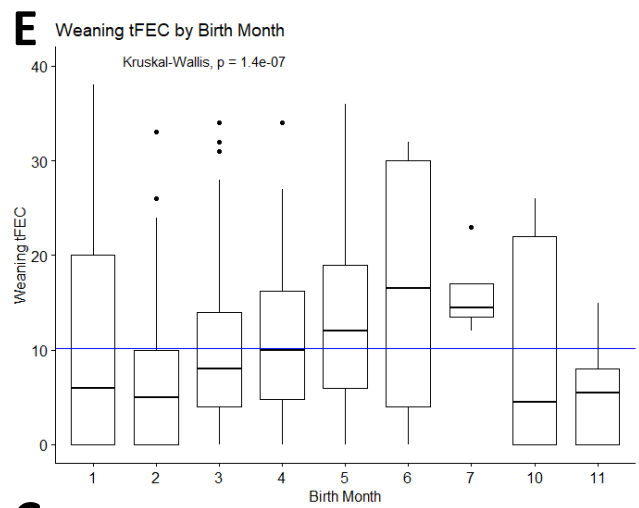

**B**

| Variable             | Chi-Squared | df  | Kruskal-Wallis P-Value |
|----------------------|-------------|-----|------------------------|
| Sex                  | 0.094       | 1   | 0.759                  |
| Birth Year           | 17.60       | 4   | 0.001477               |
| Birth Month          | 47.28       | 8   | 1.35E-07               |
| Birth Type/Rear Type | 25.99       | 4   | 3.18E-05               |
| NSIP Flock           | 82.85       | 19  | 5.96E-10               |
| Age of Dam           | 13.43       | 10  | 0.200                  |
| Sire ID              | 124.84      | 122 | 0.411                  |

**C**

| Statistic | Weaning tFEC       | Weaning FEC        |
|-----------|--------------------|--------------------|
| Minimum   | Not Detected (<50) | Not Detected (<50) |
| Maximum   | 38                 | 56,200             |
| Mean      | 10.18              | 3,869              |
| Median    | 8                  | 500                |
| Mode      | Not Detected (<50) | Not Detected (<50) |

**Supplementary Figure S2.** Statistical evaluation of potential GWAS fixed effects against weaning tFEC. (A) Katahdin NSIP-enrolled flock and weaning tFEC, (B) birth/rear type and weaning tFEC,

(C) birth month and weaning tFEC, (D) summary table of Kruskal-Wallis testing of significant and non-significant variables, (E) summary of weaning tFEC and FEC phenotypic data. The horizontal blue line in A, B and C represents the population mean weaning tFEC.

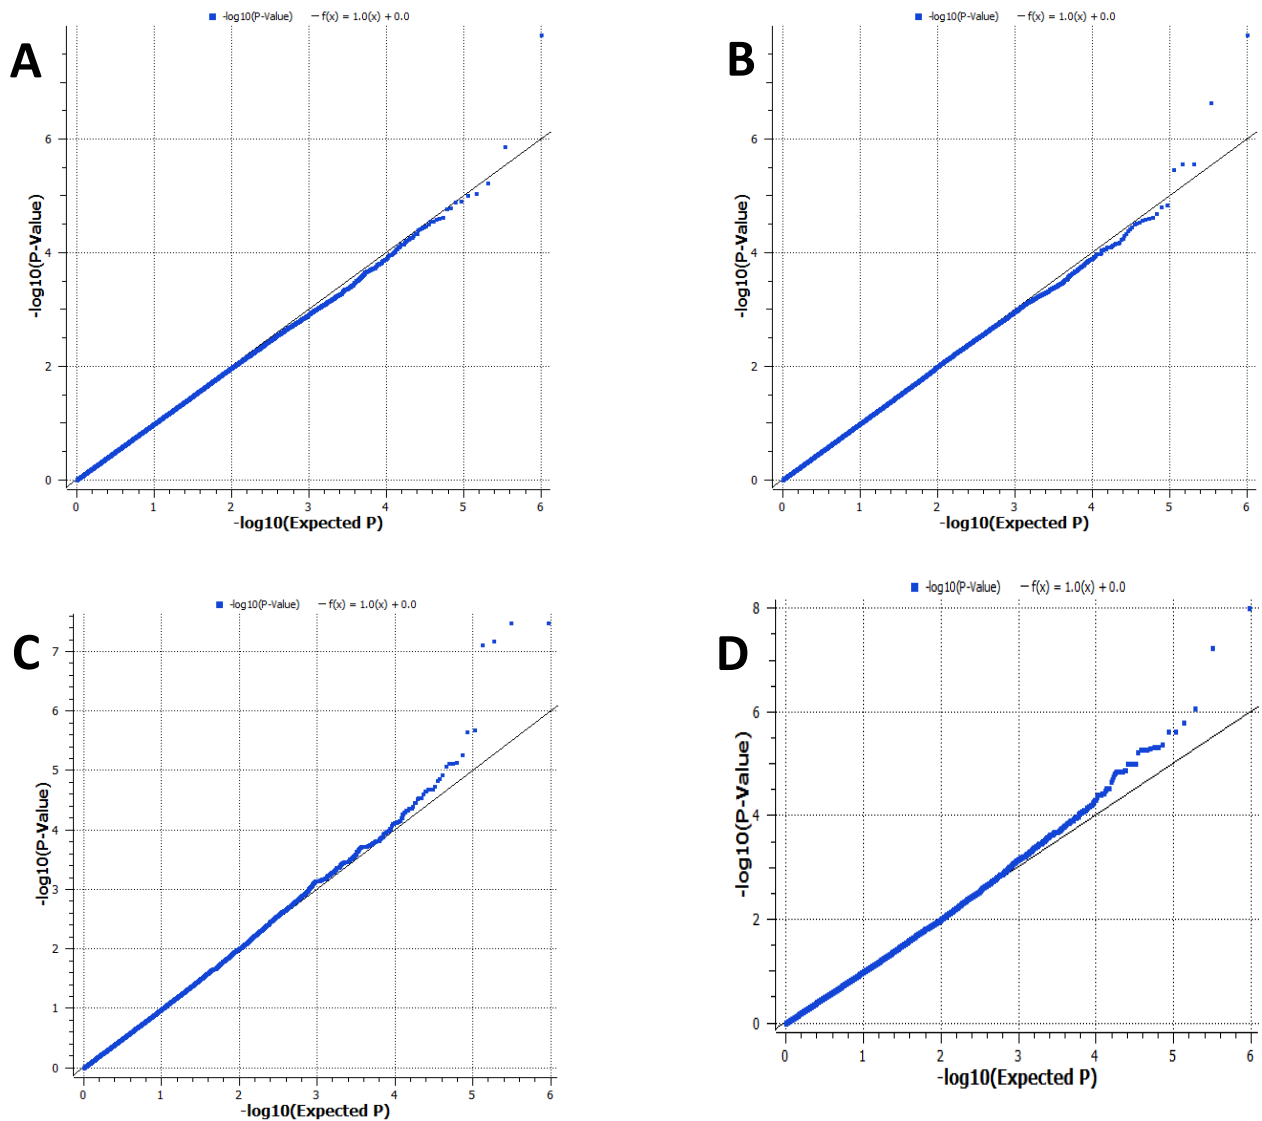

**Supplementary Figure S3.** Quantile-quantile (QQ) plot from linear regression (LR) and case-control (CC) EMMAX GWAS with weaning tFEC. QQ plots displaying observed versus expected  $P$ -values

for EMMAX GWAS for (A) LR additive inheritance model, (B) LR dominant inheritance model, (C) LR recessive inheritance model and (D) CC recessive model.

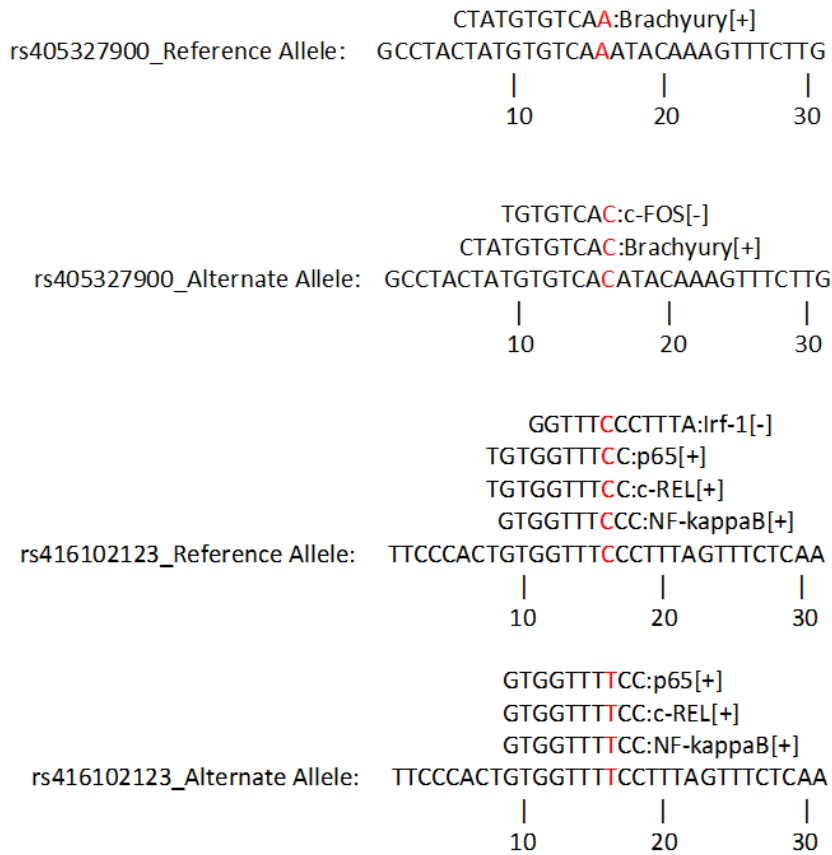

**Supplementary Figure S4.** Graphical representation of ConSite transcription factor binding site (TFBS) analysis. Figure displays sequence alignment results for TFBS analysis. Results with score differences between alternate and reference allele sequences are displayed.

**Supplementary Table S1.** ConSite transcription factor binding site (TFBS) analysis results. Table displays complete results from ConSite query of significant SNPs. The 15 bp immediately 3' and 5' of each SNP were tested with either the reference or alternate SNP allele in position 16 of the query sequence. No results are shown for rs417983470 as sequence queries did not predict any TFBS when tested with alternate or reference allele.

| DNA Sequence with SNP Reference Allele |                |      |    |        |        | DNA Sequence with SNP Alternate Allele |              |      |    |        |        |
|----------------------------------------|----------------|------|----|--------|--------|----------------------------------------|--------------|------|----|--------|--------|
| <b>rs405327900</b>                     |                |      |    |        |        |                                        |              |      |    |        |        |
| Transcription factor                   | Sequence       | From | To | Score  | Strand | Transcription factor                   | Sequence     | From | To | Score  | Strand |
| Brachyury                              | CTATGTGTCAA    | 6    | 16 | 12.307 | +      | Brachyury                              | CTATGTGTCCAC | 6    | 16 | 9.999  | +      |
| Broad-complex_1                        | TATGTGTCAAATAC | 7    | 20 | 8.514  | -      | c-FOS                                  | ATGTGTCA     | 8    | 15 | 6.529  | +      |
| c-FOS                                  | ATGTGTCA       | 8    | 15 | 6.529  | +      | c-FOS                                  | TGTGTCCAC    | 9    | 16 | 8.141  | -      |
| HFH-1                                  | CAAAGTTTCTT    | 20   | 30 | 7.786  | +      | HFH-1                                  | CAAAGTTTCTT  | 20   | 30 | 7.786  | +      |
| <b>rs413712238</b>                     |                |      |    |        |        |                                        |              |      |    |        |        |
| Transcription factor                   | Sequence       | From | To | Score  | Strand | Transcription factor                   | Sequence     | From | To | Score  | Strand |
| Thing1-E47                             | TTTCTGTAAT     | 6    | 15 | 6.663  | +      | Thing1-E47                             | TTTCTGTAAT   | 6    | 15 | 6.663  | +      |
| E4BP4                                  | TTCTGTAATAG    | 7    | 17 | 9.032  | +      | E4BP4                                  | TTCTGTAATGG  | 7    | 17 | 9.032  | +      |
| Irf-1                                  | GCTTTCAGCTTT   | 17   | 28 | 9.852  | -      | Irf-1                                  | GCTTTCAGCTTT | 17   | 28 | 9.852  | -      |
| <b>rs416102123</b>                     |                |      |    |        |        |                                        |              |      |    |        |        |
| Transcription factor                   | Sequence       | From | To | Score  | Strand | Transcription factor                   | Sequence     | From | To | Score  | Strand |
| SOX17                                  | CCCACTGTG      | 3    | 11 | 6.855  | +      | SOX17                                  | CCCACTGTG    | 3    | 11 | 6.855  | +      |
| AML-1                                  | ACTGTGGTT      | 6    | 14 | 11.349 | +      | AML-1                                  | ACTGTGGTT    | 6    | 14 | 11.349 | +      |
| Dorsal_1                               | CTGTGGTTTCCC   | 7    | 18 | 7.992  | +      | Dorsal_1                               | TGTGGTTTCCCT | 8    | 19 | 7.766  | +      |
| Dorsal_2                               | GTGGTTTCCC     | 9    | 18 | 10.489 | +      | Dorsal_2                               | GTGGTTTCC    | 9    | 18 | 12.811 | +      |
| NF-kappaB                              | GTGGTTTCCC     | 9    | 18 | 7.701  | +      | NF-kappaB                              | GTGGTTTCC    | 9    | 18 | 7.849  | +      |
| c-REL                                  | TGTGGTTTCC     | 8    | 17 | 8.335  | +      | c-REL                                  | GTGGTTTCC    | 9    | 18 | 9.179  | +      |
| P65                                    | TGTGGTTTCC     | 8    | 17 | 7.822  | +      | P65                                    | GTGGTTTCC    | 9    | 18 | 9.132  | +      |
| Irf-1                                  | GGTTCCCTTA     | 11   | 22 | 10.652 | -      | E74A                                   | TTTCCTT      | 14   | 20 | 6.669  | -      |
